# Supplementary material for: Whole genome profiling of 400 patients at risk for hereditary cancer in a Brazilian cohort
Source: Research Square preprint supplement (doi:10.21203/rs.3.rs-7104192/v1), 2025-08-22
Supplement: Supplementary file 1 [file 31d2325f161c2e9da7b179af.docx]

**Inclusion criteria for the hereditary cancer cohort within the Brazilian Rare Genomes Project**

1. Presence of current or previous histopathological diagnosis when meeting **one or more** of the following criteria:
   1. Diagnosis of solid cancer ≤ 45 years old (breast, kidney, sarcoma), < 50 years old (colon, GIST), < 40 years old (diffuse gastric cancer)
   2. Diagnosis of >10 adenomatous polyps or >2 hamartomatous polyps or >5 serrated polyps near the sigmoid colon
   3. Multiple primary tumors
   4. Bilateral cancer in paired organs
   5. Male breast cancer
   6. Ovarian cancer (epithelial tumor) or exocrine pancreas or adrenocortical carcinoma or carcinoma of the plexus choroid or anaplastic rhabdomyosarcoma or central nervous system (CNS) hemangioblastoma or medullary thyroid carcinoma at any age and regardless of family history
   7. Diagnosis of solid cancer between 46 and 60 years when meeting at least one of the following criteria:
      1. ≥1 relative of 1st, 2nd, and 3rd degree with solid cancer diagnosed at ≤50 years old
      2. At least two relatives of 1st or 2nd degree with solid cancer at any age
   8. Triple negative breast cancer
   9. Metastatic prostate cancer
   10. Colonic cancer with immunohistochemical loss of mismatch repair proteins: PMS2, MLH1, MSH2, and MSH6 and/or microsatellite instability
   11. Child with cancer and family history of:
       1. Relative with ≥2 childhood malignancies (≤18 years)
       2. First-degree relative (sibling or parent) with cancer <45 years old
       3. ≥2 2nd degree relatives with cancer <45 years old on the same side of the family
       4. Consanguineous parents
   12. Child with one of the following childhood tumors:

i) Adrenocortical carcinoma, atypical teratoid rhabdoid tumor, cerebellar gangliocytoma, choroid plexus carcinoma, endolymphatic sac tumor, hemangioblastoma, hepatoblastoma, juvenile myelomonocytic leukemia, low hypodiploid lymphoblastic leukemia, malignant peripheral nerve sheath tumor, medullary thyroid carcinoma, medulloblastoma, optic nerve glioma, ovarian Sertoli-Leydig cell tumor, pleuropulmonary blastoma, pituitary blastoma, retinoblastoma, schwannoma, subependymal giant cell tumor

- 1. Individual with 2 malignancies, one of which started ≤18 years old
  2. Child with rare adult tumors.

## **Consortia authorship**

The Brazilian Rare Genomes Project Consortium is composed of the following members: Antonio Victor Campos Coelho; Rafael Sales de Albuquerque; Catarina dos Santos Gomes; José Bandeira do Nascimento Junior; Gustavo Santos de Oliveira; Livia Maria Silva Moura; Luciana Souto Mofatto; Rafael Lucas Muniz Guedes; Rodrigo Araújo Sequeira Barreiro; Marcel Pinheiro Caraciolo; Ana Paula de Andrade Oliveira; Anne Caroline Barbosa Teixeira; Bruna Mascaro Cordeiro de Azevedo; Carolina Dias Carlos; Lucas Santos de Santana; Marina Cadena da Matta; Matheus Martinelli Lima; Nuria Bengala Zurro; Renata Yoshiko Yamada; Vivian Pedigone Cintra; Gabriela Pereira Campilongo; Gabriela Borges Cherulli Colichio; Renata Martins Ribeiro da Silva; Caio Robledo D’Angioli Costa Quaio; Carolina Araújo Moreno; Eduardo Perrone; Jéssica Grasiela Araújo Espolaor; Joana Rosa Marques Prota; José Ricardo Magliocco Ceroni; Kelin Chen; Luiza do Amaral Virmond; Marina de Franca Basto Silva; Michele Patricia Migliavacca; Renata Moldenhauer Minillo; Thiago Yoshinaga Tonholo Silva; Karla de Oliveira Pelegrino; Tatiana Ferreira de Almeida; João Bosco Oliveira.
