# Supplementary material for: Whole genome profiling of 400 patients at risk for hereditary cancer in a Brazilian cohort
Source: Research Square preprint supplement (doi:10.21203/rs.3.rs-7104192/v1), 2025-08-22
Supplement: Supplementary file 2 [file 78a01875926200568f366bc2.xlsx]

## Sheet: P and LP variants
Supplementary Table S2. List of Pathogenic and Likely pathogenic variants reported in WGS.
Chromossome	Gene	Reference Sequence	Coding	Protein	Variant annotation	Variant classification	RefSeq ID	Number of probands carrying variant
4	ANTXR2	NM_058172.6	c.1287_1288del	p.(Arg429Serfs*20)	Frameshift deletion	Likely Pathogenic	-	1
4	ANTXR2	NM_058172.6	c.487-2A>G	-	Splice Site SNV	Likely Pathogenic	-	1
5	APC	NM_000038.6	c.1522_1523del	p.(Leu508Aspfs*28)	Frameshift deletion	Likely Pathogenic	rs886039509	1
5	APC	NM_000038.6	c.2413C>T	p.(Arg805Ter)	Stop gain	Pathogenic	rs587779783	1
5	APC	NM_000038.6	c.2805C>G	p.(Tyr935Ter)	Stop gain	Pathogenic	rs137854575	1
11	ATM	NM_000051.4	c.2620G>T	p.(Glu874Ter)	Stop gain	Likely Pathogenic	rs1565416901	1
11	ATM	NM_000051.4	c.5644C>T	p.(Arg1882Ter)	Stop gain	Pathogenic	rs786204433	1
11	ATM	NM_000051.4	c.8819delA	p.(Asn2940Thrfs*7)	Frameshift deletion	Likely Pathogenic	-	1
11	ATM:Seq[GRCh38] del(11)(q22.3q22.3)	NC_000011.10	g.(108363451_108373309)del	-	Deletion (CNV)	Pathogenic	-	1
2	BARD1:seq[GRCh38] del(2)(q35q35)	NC_000002.12	g.(214806185_214812894)del	-	Deletion (CNV)	Likely Pathogenic	-	1
17	BRCA1	NM_007294.4	c.211A>G	p.(Arg71Gly)	Nonsynonymus SNV	Pathogenic	rs80357382	3
17	BRCA1	NM_007294.4	c.2212_2215del	p.(Val738Lysfs*14)	Frameshift deletion	Pathogenic	rs397508951	1
17	BRCA1	NM_007294.4	c.3331_3334del	p.(Gln1111Asnfs*5)	Frameshift deletion	Pathogenic	rs80357701	3
17	BRCA1	NM_007294.4	c.441+2T>A	-	Splice Site SNV	Pathogenic	rs397509173	1
17	BRCA1	NM_007294.4	c.4484G>T	p.(Arg1495Met)	Nonsynonymus SNV	Pathogenic	rs80357389	1
17	BRCA1	NM_007294.4	c.4675+1G>A	-	Splice Site SNV	Pathogenic	rs80358044	1
17	BRCA1	NM_007294.4	c.4986+6T>C	-	Intronic SNV	Likely Pathogenic	rs80358086	1
17	BRCA1	NM_007294.4	c.5251C>T	p.(Arg1751Ter)	Stop gain	Pathogenic	rs80357123	2
17	BRCA1	NM_007294.4	c.66dup	p.(Glu23Argfs*18)	Frameshift duplication	Pathogenic	rs80357783	3
17	BRCA1	NM_007294.4	c.798_799del	p.(Ser267Lysfs*19)	Frameshift deletion	Pathogenic	rs80357724	1
13	BRCA2	NM_000059.4	c.1796_1800del	p.(Ser599Ter)	Stop gain	Pathogenic	rs276174813	1
13	BRCA2	NM_000059.4	c.2808_2811del	p.(Ala938Profs*21)	Frameshift deletion	Pathogenic	rs80359351	2
13	BRCA2	NM_000059.4	c.5073dup	p.(Trp1692Metfs*3)	Frameshift indel	Pathogenic	rs80359479	1
13	BRCA2	NM_000059.4	c.5771_5774del	p.(Ile1924Argfs*38)	Frameshift deletion	Pathogenic	rs80359535	1
13	BRCA2	NM_000059.4	c.6024dup	p.(Gln2009Alafs*9)	Frameshift duplication	Pathogenic	rs80359554	1
13	BRCA2	NM_000059.4	c.6405_6409del	p.(Asn2135Lysfs*3)	Frameshift deletion	Pathogenic	rs80359584	1
13	BRCA2	NM_000059.4	c.6644_6647del	p.(Tyr2215Serfs*13)	Frameshift deletion	Pathogenic	rs80359616	1
13	BRCA2	NM_000059.4	c.6952C>T	p.(Arg2318Ter)	Stop gain	Pathogenic	rs80358920	1
13	BRCA2	NM_000059.4	c.7124T>G	p.(Leu2375Ter)	Stop gain	Pathogenic	rs886040687	3
13	BRCA2	NM_000059.4	c.7211_7212del	p.(Lys2404Serfs*7)	Frameshift deletion	Pathogenic	rs80359642	1
13	BRCA2	NM_000059.4	c.738del	p.(Phe246Leufs*5)	Frameshift deletion	Pathogenic	rs1566221413	2
13	BRCA2	NM_000059.4	c.9382C>T	p.(Arg3128Ter)	Stop gain	Pathogenic		1
13	BRCA2	NM_000059.4	c.8485del	p.(Gln2829Serfs*34)	Frameshift deletion	Likely Pathogenic	-	1
17	BRIP1	NM_032043	c.484C>T	p.(Arg162Ter)	Stop gain	Pathogenic	rs747604569	1
16	CDH1	NM_004360.5	c.1319del	p.(Lys440Argfs*15)	Frameshift deletion	Likely Pathogenic	-	1
16	CDH1	NM_004360.5	c.2267_2268del	p.(Asp756Glyfs*12)	Frameshift deletion	Likely Pathogenic	-	1
22	CHEK2	NM_007194.4	c.1100del	p.(Thr367Metfs*15)	Frameshift deletion	Pathogenic	rs555607708	1
22	CHEK2	NM_007194.4	c.1188del	p.(Val397Phefs*17)	Frameshift deletion	Likely Pathogenic	rs753159426	1
22	CHEK2	NM_007194.4	c.349A>G	p.(Arg117Gly)	Nonsynonymus SNV	Likely Pathogenic	rs28909982	1
16	FANCA	NM_000135.4	c.3788_3790del	p.(Phe1263del)	Inframe deletion	Pathogenic	rs397507553	1
15	FANCI	NM_001113378.2	c.3644dup	p.(Tyr1215Ter)	Stop gain	Likely Pathogenic	-	1
14	FANCM	NM_020937.4	c.2586_2589del	p.(Lys863Ilefs*12)	Frameshift deletion	Pathogenic	rs768006618	1
22	LZTR1	NM_006767.4	c.1078A>T	p.(Lys360Ter)	Stop gain	Likely Pathogenic	rs751308379	1
3	MITF	NM_000248.4	c.952G>A	p.(Glu318Lys)	Nonsynonymus SNV	Likely Pathogenic	rs149617956	1
3	MLH1	NM_000249.4	c.1387G>T	p.(Gly463Ter)	Stop gain	Likely Pathogenic	rs1559554339	1
3	MLH1	NM_000249.4	c.2041G>A	p.(Ala681Thr)	Nonsynonymus SNV	Pathogenic	rs63750217	1
3	MLH1	NM_000249.4	c.677G>A	p.(Arg226Gln)	Nonsynonymus SNV	Pathogenic	rs63751711	1
5	MSH3	NM_002439.5	c.1421_1422del	p.(Glu474Valfs*8)	Frameshift deletion	Pathogenic	rs778610412	1
2	MSH6	NM_000179.3	c.3698_3702dup	p.(Leu1235Lysfs*7)	Frameshift duplication	Likely Pathogenic	rs193922343	1
2	MSH6	NM_000179.3	c.3724_3726del	p.(Arg1242del)	Inframe deletion	Likely Pathogenic	rs63749942	1
1	MUTYH	NM_001048174.2	c.1063del	p.(Ala357Profs*23)	Frameshift deletion	Pathogenic	rs587778536	1
1	MUTYH	NM_001048174.2	c.1103G>A	p.(Gly368Asp)	Nonsynonymus SNV	Pathogenic	rs36053993	3
1	MUTYH	NM_001048174.2	c.452A>G	p.(Tyr151Cys)	Nonsynonymus SNV	Pathogenic	rs34612342	2
17	NF1	NM_001042492.3	c.1642-449A>G	-	Intronic SNV	Likely Pathogenic	rs863224655	1
17	NF1	NM_001042492.3	c.2326-1G>T	-	Splice Site SNV	Likely Pathogenic	-	1
17	NF1	NM_001042492.3	c.4109del	p.(Gln1370Argfs*8)	Frameshift deletion	Pathogenic	-	1
17	NF1	NM_001042492.3	c.4725-2A>G	-	Splice Site SNV	Pathogenic	rs1295045178	1
17	NF1	NM_001042492.3	c.5835_5838del	p.(Cys1945Trpfs*4)	Frameshift deletion	Pathogenic	-	1
16	NTHL1	NM_002528.7	c.115+1G>A	p.(?)	Splice Site SNV	Likely Pathogenic	rs749908882	1
16	NTHL1	NM_002528.7	c.244C>T	p.(Gln82Ter)	Stop gain	Pathogenic	rs150766139	1
16	PALB2	NM_024675.4	c.1671_1674del	p.(Ile558Lysfs*2)	Frameshift deletion	Pathogenic	rs1060502734	2
16	PALB2	NM_024675.4	c.2964del	p.(Val989Ter)	Stop gain	Pathogenic	rs587781840	1
7	PMS2	NM_000535.7	c.1239dup	p.(Asp414Argfs*44)	Frameshift duplication	Pathogenic	rs267608159	1
12	POLE	NM_006231.4	c.1983_1985delinsGGAATAAGCCTTCAATAAGCCTGAAGCCACCTGTGCTGCCTGTGACTTCAATAAGC	p.(Asn662Glufs*2)	Frameshift indel	Likely Pathogenic	-	1
6	POLH	NM_006502.3	c.1222_1225del	p.(Thr408Leufs*36)	Frameshift deletion	Likely Pathogenic	rs750991026	2
5	RAD50	NM_005732.4	c.193dupA	p.(Thr65Asnfs*24)	Frameshift duplication	Likely Pathogenic	-	1
17	RAD51C	NM_058216.3	c.404G>A	p.(Cys135Tyr)	Splice Site SNV	Likely Pathogenic	rs767796996	1
17	RAD51C	NM_058216.3	c.709C>T	p.(Arg237Ter)	Stop gain	Pathogenic	rs770637624	1
10	RET	NM_020975.6	c.2410G>A	p.(Val804Met)	Nonsynonymus SNV	Likely Pathogenic	rs79658334	1
1	SDHB	NM_003000.3	c.79C>T	p.(Arg27Ter)	Stop gain	Pathogenic	rs74315369	1
1	SDHB:Seq[GRCh38] del(1)(p36.13p36.13)	NC_000001.11	g.(17048756-17064430)del	-	Deletion (CNV)	Pathogenic	-	2
19	STK11	NM_000455.5	c.944del	p.(Pro315ArgfsTer21)	Frameshift deletion	Likely Pathogenic	-	1
17	TP53	NM_000546.6	c.392_398dup	p.(Met133Ilefs*18)	Frameshift duplication	Likely Pathogenic	-	1
17	TP53	NM_000546.6	c.725G>A	p.(Cys242Tyr)	Nonsynonymus SNV	Pathogenic	rs121912655	1
17	TP53	NM_000546.6	c.742C>T	p.(Arg248Trp)	Nonsynonymus SNV	Pathogenic	rs121912651	1
17	TP53	NM_000546.6	c.97-1G>T	-	Splice Site SNV	Likely Pathogenic	rs1597375294	1
3	XPC	NM_004628.5	c.2251-1G>C	-	Splice Site SNV	Pathogenic	rs754673606	1
7	XRCC2	NM_005431.2	c.378_381del	p.(Leu126Phefs*7)	Frameshift deletion	Likely Pathogenic	rs763401560	2
-	seq[GRCh38] del(16)(q24.3q24.3)	NC_000016.10	g.(89735837_89807671)del	-	Deletion (CNV)	Likely Pathogenic	-	1

## Sheet: Double heterozygotes
Double heterozygotes
Genes	Transcript	DNA	Protein	Variant annotation
ANTXR2/ANTXR2	NM_058172.6	ANTXR2:c.1287_1288del/ANTXR2:c.487-2A>G	p.(Arg429Serfs*20)/?	Frameshift deletion/Splice site SNV
BRCA1/seq[GRCh38] del(16)(q24.3q24.3)	NM_007294.4/ NC_000016.10	BRCA1:c.3331_3334del/g.(89735837_89807671)del	p.(Gln1111Asnfs*5)/-	Frameshift deletion/Deletion (CNV)
BRCA1/BRCA2	NM_007294.4/ NM_000059.4	BRCA1:c.798_799del/BRCA2:c.2808_2811del	p.(Ser267Lysfs*19)/p.(Ala938Profs*21)	Frameshift deletion/Frameshift deletion
BRCA2/ATM	NM_000059.4/NM_000051.4	BRCA2:c.7124T>G/ATM:c.8819delA	p.(Leu2375Ter)/p.(Asn2940Thrfs*7)	Stopgain/Frameshift deletion
BRCA2/MUTYH	NM_000059.4/NM_001048174.2	BRCA2:c.738del/MUTYH:c.1063del	p.(Phe246Leufs*5)/p.(Ala357Profs*23)	Frameshift deletion/Frameshift deletion
BRCA2/MUTYH	NM_000059.4/NM_001048174.2	BRCA2:c.6644_6647del/MUTYH:c.1103G>A	p.(Tyr2215Serfs*13)/p.(Gly368Asp)	Frameshift deletion/Nonsynonymus SNV

## Sheet: ACMG secondary findings
ACMG secondary findings
Chromossome	Gene	Reference Sequence	Coding	Protein	Variant annotation	Variant classification	RefSeq ID	Number of probands carrying variant
7	FLNC	NM_001458.5	c.4275dup	p.(Arg1426Alafs*85)	Frameshift duplication	Likely Pathogenic	rs756985550	1
7	KCNH2	NM_000238.4	c.80del	p.(Arg27Leufs*33)	Frameshift deletion	Likely Pathogenic	rs2117063981	2
11	KCNQ1	NM_000218.3	c.1893dup	p.(Arg632GlnfsTer20)	Frameshift duplication	Pathogenic	rs397508104	1
11	MYBPC3	NM_000256.3	c.2376G>A	p.(Trp792Ter)	Stop gain	Likely Pathogenic	rs863225112	1
19	RYR1	NM_000540.3	c.14545G>A	p.(Val4849Ile)	Nonsynonymus SNV	Pathogenic	rs118192168	1
15	TPM1	NM_001018005.2	c.62G>T	p.(Arg21Leu)	Nonsynonymus SNV	Likely Pathogenic	rs730881151	2
2	TTN	NM_001267550.2	c.24913C>T	p.(Arg8305Ter)	Stop gain	Likely Pathogenic	rs760266983	1
2	TTN	NM_001267550.2	c.48638+1G>A	p?	Splice Site SNV	Likely Pathogenic	-	1
2	TTN	NM_001267550.2	c.93181del	p.(Arg31061Valfs*33)	Frameshift deletion	Likely Pathogenic	rs2154147379	1
18	TTR	NM_000371.4	c.424G>A	p.(Val142Ile)	Nonsynonymus SNV	Pathogenic	rs76992529	4

## Sheet: P and LP in inconclusive cases
List of P and LP variants in patients with inconclusive WGS results.
Patient	Personal history	Gene	Reference Sequence	Coding	Protein	Variant annotation	Variant classification	RefSeq ID
79	Breast cancer	RAD50	NM_005732.4	c.193dupA	p.(Thr65Asnfs*24)	Frameshift duplication	Likely Pathogenic	-
80	Breast cancer	XRCC2	NM_005431.2	c.378_381del	p.(Leu126Phefs*7)	Frameshift deletion	Likely Pathogenic	rs763401560
84	Ovarian cancer	LZTR1	NM_006767.4	c.1078A>T	p.(Lys360Ter)	Stop gain	Likely Pathogenic	rs751308379
94	Bilateral ovarian cancer	MUTYH	NM_001048174.2	c.1103G>A	p.(Gly368Asp)	Nonsynonymus SNV	Pathogenic	rs36053993
102	Breast cancer	NTHL1	NM_002528.7	c.115+1G>A	p.(?)	Splice Site SNV	Likely Pathogenic	rs749908882
103	Bilateral breast cancer	SDHB	Seq[GRCh38] del(1)(p36.13p36.13) NC_000001.11	g.(17048756-17064430)del	-	Deletion	Pathogenic	-
117	Breast cancer	FANCA	NM_000135.4	c.3788_3790del	p.(Phe1263del)	Inframe deletion	Pathogenic	rs397507553
121	Adrenocortical carcinoma	XRCC2	NM_005431.2	c.378_381del	p.(Leu126Phefs*7)	Frameshift deletion	Likely Pathogenic	rs763401560
128	Breast cancer	MUTYH	NM_001048174.2	c.1103G>A	p.(Gly368Asp)	Nonsynonymus SNV	Pathogenic	rs36053993
143	Breast cancer	POLH	NM_006502.3	c.1222_1225del	p.(Thr408Leufs*36)	Frameshift deletion	Likely Pathogenic	rs750991026
151	Breast cancer	POLH	NM_006502.3	c.1222_1225del	p.(Thr408Leufs*36)	Frameshift deletion	Likely Pathogenic	rs750991026
171	Ovarian cancer	MUTYH	NM_001048174.2	c.452A>G	p.(Tyr151Cys)	Nonsynonymus SNV	Pathogenic	rs34612342
176	Breast cancer	MUTYH	NM_001048174.2	c.452A>G	p.(Tyr151Cys)	Nonsynonymus SNV	Pathogenic	rs34612342
179	Breast cancer	MSH3	NM_002439.5	c.1421_1422del	p.(Glu474Valfs*8)	Frameshift deletion	Pathogenic	rs778610412

## Sheet: VUS
List of VUS reported in WGS.
Chromossome	Gene	Reference Sequence	Coding	Protein	Variant type	RefSeq ID	Number of probands carrying variant
4	ABRAXAS1	NM_139076.3	c.1106G>A	p.(Arg369Gln)	Nonsynonymus SNV	rs755313466	1
5	APC	NM_000038.6	c.4091G>A	p.(Ser1364Asn)	Nonsynonymus SNV	rs1391469838	1
5	APC	NM_000038.6	c.5801C>G	p.(Pro1934Arg)	Nonsynonymus SNV	rs587780600	1
5	APC	NM_000038.6	c.7193C>T	p.(Ser2398Phe)	Nonsynonymus SNV	rs150882838	1
5	APC	NM_000038.6	c.8183T>G	p.(Val2728Gly)	Nonsynonymus SNV	rs748952997	1
5	APC	NM_000038.6	c.8524T>G	p.(Ser2842Ala)	Nonsynonymus SNV	rs587780610	1
11	ATM	NM_000051.4	c.1595G>A	p.(Cys532Tyr)	Nonsynonymus SNV	rs35963548	1
11	ATM	NM_000051.4	c.2746G>A	p.(Val916Met)	Nonsynonymus SNV	rs2081388106	1
11	ATM	NM_000051.4	c.4010T>A	p.(Ile1337Asn)	Nonsynonymus SNV	rs1060501660	1
11	ATM	NM_000051.4	c.5821G>C	p.(Val1941Leu)	Nonsynonymus SNV	rs147187700	1
11	ATM	NM_000051.4	c.7208A>T	p.(Asn2403Ile)	Nonsynonymus SNV	rs1355602677	1
11	ATM	NM_000051.4	c.7375C>G	p.(Arg2459Gly)	Nonsynonymus SNV	rs730881383	2
11	ATM	NM_000051.4	c.7552C>T	p.(Pro2518Ser)	Nonsynonymus SNV	rs374876799	1
11	ATM	NM_000051.4	c.8560C>T	p.(Arg2854Cys)	Nonsynonymus SNV	rs201958469	1
3	ATR	NM_001184.4	c.14G>T	p.(Gly5Val)	Nonsynonymus SNV	rs200753177	1
3	ATR	NM_001184.4	c.2794C>A	p.(Pro932Thr)	Nonsynonymus SNV	-	2
3	ATR	NM_001184.4	c.4035T>A	p.(Asp1345Glu)	Nonsynonymus SNV	rs983000315	1
17	AXIN2	NM_000051.4	c.112C>G	p.(Pro38Ala)	Nonsynonymus SNV	rs878854716	1
3	BAP1	NM_004656.4	c.227T>C	p.(Ile76Thr)	Nonsynonymus SNV	rs1221534458	1
3	BAP1	NM_004656.4	c.535C>T	p.(Arg179Trp)	Nonsynonymus SNV	rs910211860	1
2	BARD1	NM_000465.4	c.121C>T	p.(Leu41Phe)	Nonsynonymus SNV	rs751665426	1
2	BARD1	NM_000465.4	c.353A>G	p.(Asn118Ser)	Nonsynonymus SNV	rs142864491	1
17	BRCA1	NM_007294.4	c.2299A>G	p.(Ser767Gly)	Nonsynonymus SNV	rs80357194	1
17	BRCA1	NM_007294.4	c.5425_5430del	p.(Val1809_Val1810del)	Inframe deletion	rs80358348	1
17	BRCA1	NM_007294.4	c.995G>A	p.(Arg332Gln)	Nonsynonymus SNV	rs80357464	1
13	BRCA2	NM_000059.4	c.1976T>C	p.(Leu659Ser)	Nonsynonymus SNV	-	1
13	BRCA2	NM_000059.4	c.3321A>C	p.(Gln1107His)	Nonsynonymus SNV	rs397507306	1
13	BRCA2	NM_000059.4	c.449A>G	p.(His150Arg)	Nonsynonymus SNV	rs397507722	1
13	BRCA2	NM_000059.4	c.5155_5157del	p.(Asn1719del)	Inframe deletion	-	1
13	BRCA2	NM_000059.4	c.5270A>G	p.(Tyr1757Cys)	Nonsynonymus SNV	rs587776466	1
13	BRCA2	NM_000059.4	c.5612G>A	p.(Ser1871Asn)	Nonsynonymus SNV	rs80358782	1
13	BRCA2	NM_000059.4	c.6281A>G	p.(Tyr2094Cys)	Nonsynonymus SNV	rs397507838	1
13	BRCA2	NM_000059.4	c.8036A>G	p.(Asp2679Gly)	Nonsynonymus SNV	rs80359041	1
13	BRCA2	NM_000059.4	c.8482A>G	p.(Ile2828Val)	Nonsynonymus SNV	rs80359098	1
13	BRCA2	NM_000059.4	c.8518A>G	p.(Ile2840Val)	Nonsynonymus SNV	rs80359103	1
13	BRCA2	NM_000059.4	c.8902A>G	p.(Thr2968Ala)	Nonsynonymus SNV	rs587782021	2
13	BRCA2	NM_000059.4	c.9442G>T	p.(Ala3148Ser)	Nonsynonymus SNV	rs949790323	1
13	BRCA2	NM_000059.4	c.5018C>T	p.(Thr1673Ile)	Nonsynonymus SNV	rs376249157	1
17	BRIP1	NM_032043.3	c.2564G>A	p.(Arg855His)	Nonsynonymus SNV	rs200894063	1
17	BRIP1	NM_032043.3	c.466G>T	p.(Val156Leu)	Nonsynonymus SNV	rs876659373	1
17	BRIP1	NM_032043.3	c.3559G>A	p.(Ala1187Thr)	Nonsynonymus SNV	rs367610893	1
16	CDH1	NM_004360.5	c.1876T>G	p.(Phe626Val)	Nonsynonymus SNV	rs876660603	1
16	CDH1	NM_004360.5	c.1996A>C	p.(Asn666His)	Nonsynonymus SNV	rs150427791	1
9	CDKN2A	NM_000077.5	c.266G>T	p.(Gly89Val)	Nonsynonymus SNV	-	1
9	CDKN2A	NM_058195.4	c.160C>A	p.(Arg54Ser)	Nonsynonymus SNV	rs896054565	1
22	CHEK2	NM_007194.4	c.1141A>G	p.(Met381Val)	Nonsynonymus SNV	rs375130261	1
22	CHEK2	NM_007194.4	c.1183G>T	p.(Val395Phe)	Nonsynonymus SNV	rs587780170	1
22	CHEK2	NM_007194.4	c.170C>G	p.(Ser57Cys)	Nonsynonymus SNV	rs730881695	1
22	CHEK2	NM_007194.4	c.88G>A	p.(Gly30Ser)	Nonsynonymus SNV	rs1555932749	1
22	CHEK2	NM_007194.4	c.904G>A	p.(Glu302Lys)	Nonsynonymus SNV	rs587782460	1
22	CHEK2	NM_007194.4	c.962A>C	p.(Glu321Ala)	Nonsynonymus SNV	rs374395284	1
22	CHEK2	NM_007194.4	c.1513T>C	p.(Ser505Pro)	Nonsynonymus SNV	rs587781960	1
2	EPCAM	NM_002354.3	c.413G>A	p.(Arg138Gln)	Nonsynonymus SNV	rs747098539	1
16	FANCA	NM_000135.4	c.2422C>G	p.(Pro808Ala)	Nonsynonymus SNV	rs772367440	1
16	FANCA	NM_000135.4	c.3778C>G	p.(Leu1260Val)	Nonsynonymus SNV	rs1191030919	1
17	FLCN	NM_144997.7	c.249+2C>T	-	Splice site SNV	rs939223011	1
20	GNAS	NM_080425.3	c.1027C>T	p.(Pro343Ser)	Nonsynonymus SNV	-	1
10	HABP2	NM_004132.5	c.1590C>T	p.(Gly530Gly)	Synonymus SNV	-	1
5	HMMR	NM_001142556.2	c.1928T>C	p.(Val643Ala)	Nonsynonymus SNV	rs199569126	1
5	HMMR	NM_012484.3	c.1683-7C>T	-	Splice site insertion	rs773983165	1
22	LZTR1	NM_006767.4	c.1214G>C	p.(Gly405Ala)	Nonsynonymus SNV	dbSNV: 1921184	1
3	MLH1	NM_000249.4	c.1765G>C	p.(Ala589Pro)	Nonsynonymus SNV	-	1
3	MLH1	NM_000249.4	c.578C>T	p.(Ser193Leu)	Nonsynonymus SNV	rs63751480	1
14	MLH3	NM_001040108.2	c.82G>T	p.(Glu28Ter)	Stop-gain	rs780501758	1
2	MSH2	NM_000251.3	c.1045C>G	p.(Pro349Ala)	Nonsynonymus SNV	rs267607939	1
2	MSH2	NM_000251.3	c.1386+3A>G	-	Intronic SNV	rs746390631	1
2	MSH2	NM_000251.3	c.1434C>T	p.(Leu478=)	Synonymus SNV	-	1
2	MSH2	NM_000251.3	c.1571G>A	p.(Arg524His)	Nonsynonymus SNV	rs63751207	1
2	MSH2	NM_000251.3	c.1817T>A	p.(Val606Asp)	Nonsynonymus SNV	rs376044376	1
2	MSH2	NM_000251.3	c.883G>T	p.(Asp295Tyr)	Nonsynonymus SNV	-	1
5	MSH3	NM_002439.5	c.1187C>T	p.(Ala396Val)	Nonsynonymus SNV	rs1580556404	1
2	MSH6	NM_000179.3	c.166_171dup	p.(Gly56_Pro57dup)	Inframe duplication	rs786201776	1
2	MSH6	NM_000179.3	c.1730G>A	p.(Arg577His)	Nonsynonymus SNV	rs376220212	1
2	MSH6	NM_000179.3	c.3727A>G	p.(Thr1243Ala)	Nonsynonymus SNV	rs147453999	1
2	MSH6	NM_000179.3	c.457+20T>C	p.?	Splice site SNV	-	1
8	MSR1	NM_002445.4	c.217G>A	p.(Ala73Thr)	Nonsynonymus SNV	rs868009130	2
1	MUTYH	NM_001048174.2	c.397G>C	p.(Asp133His)	Nonsynonymus SNV		1
8	NBN	NM_002485.5	c.1454C>T	p.(Thr485Met)	Nonsynonymus SNV	rs200891292	1
17	NF1	NM_001042492.3	c.4118G>C	p.(Cys1373Ser)	Nonsynonymus SNV	rs786202990	1
16	NTHL1	NM_002528.7	c.113C>T	p.(Ala38Val)	Nonsynonymus SNV	rs202082304	1
16	NTHL1	NM_002528.7	c.604G>A	p.(Glu202Lys)	Nonsynonymus SNV	rs919177150	1
16	PALB2	NM_024675.4	c.1408A>G	p.(Thr470Ala)	Nonsynonymus SNV	rs150636811	1
16	PALB2	NM_024675.4	c.1696C>T	p.(Arg566Cys)	Nonsynonymus SNV	rs746582620	1
16	PALB2	NM_024675.4	c.2506G>A	p.(Val836Ile)	Nonsynonymus SNV	rs536644825	1
16	PALB2	NM_024675.4	c.2659A>G	p.(Ile887Val)	Nonsynonymus SNV	rs533814557	1
16	PALB2	NM_024675.4	c.2869A>C	p.(Lys957Gln)	Nonsynonymus SNV	rs515726103	1
16	PALB2	NM_024675.4	c.2996+5G>T	p.(?)	Intronic SNV	rs879254193	1
16	PALB2	NM_024675.4	c.3412G>A	p.(Ala1138Thr)	Nonsynonymus SNV	rs577651839	1
16	PALB2	NM_024675.4	c.728C>G	p.(Thr243Ser)	Nonsynonymus SNV	-	1
19	POLD1	NM_002691.4	c.1085C>G	p.(Pro362Arg)	Nonsynonymus SNV	-	1
19	POLD1	NM_002691.4	c.674G>A	p.(Arg225His)	Nonsynonymus SNV	rs144979965	1
19	POLD1	NM_002691	c.3157C>T	p.(Arg1053Cys)	Nonsynonymus SNV	rs779208942	1
12	POLE	NM_006231.4	c.13A>G	p.(Ser5Gly)	Nonsynonymus SNV	rs2043299375	1
12	POLE	NM_006231.4	c.2963C>T	p.(Ser988Leu)	Nonsynonymus SNV	rs138391248	1
12	POLE	NM_006231.4	c.5494C>T	p.(Leu1832Phe)	Nonsynonymus SNV	rs1456049352	1
12	POLE	NM_006231.4	c.6166G>A	p.(Ala2056Thr)	Nonsynonymus SNV	rs58916399	1
12	POLE	NM_006231.4	c.6658-7C>T	p.?	Splice site SNV	-	1
12	POLE	NM_006231.4	c.727T>G	p.(Trp243Gly)	Nonsynonymus SNV	-	1
7	POT1	NM_015450.3	c.44A>G	p.(Asn15Ser)	Nonsynonymus SNV	rs764821384	1
1	PTCH2	NM_003738.5	c.3584C>T	p.(Ser1195Phe)	Nonsynonymus SNV	rs145536878	1
5	RAD50	NM_005732.4	c.282A>G	p.(Ile94Met)	Nonsynonymus SNV	rs786202847	1
17	RAD51C	NM_058216.3	c.966-10C>T	-	Intronic SNV	rs2144043783	1
17	RAD51D	NM_002878.3	c.334G>A	p.(Gly112Ser)	Nonsynonymus SNV	rs753856224	1
1	RAD54L	NM_003579.4	c.1136A>G	p.(Glu379Gly)	Nonsynonymus SNV	rs930739429	1
12	RECQL	NM_002907.4	c.1216+3A>G	-	Intronic SNV	rs372364772	1
8	RECQL4	NM_004260.4	c.1394C>T	p.(Thr465Met)	Nonsynonymus SNV	rs899474226	1
8	RECQL4	NM_004260.4	c.-1C>T	-	Splice Site SNV	-	1
10	RET	NM_020975.6	c.50T>C	p.(Leu17Pro)	Nonsynonymus SNV	-	1
10	RET	NM_020975.6	c.1151C>T	p.(Pro384Leu)	Nonsynonymus SNV	-	1
17	RNF43	NM_017763.6	c.1642G>A	p.(Val548Ile)	Nonsynonymus SNV	rs375113334	1
27	RNF43	NM_017763.6	c.800G>A	p.(Ser267Asn)	Nonsynonymus SNV	-	1
5	SDHA	NM_004168.4	c.1697T>G	p.(Leu566Arg)	Nonsynonymus SNV	rs1579438883	1
18	SMAD4	NM_005359.6	c.1349A>G	p.(Gln450Arg)	Nonsynonymus SNV	-	1
19	STK11	NM_000455.5	c.1012G>A	p.(Val338Met)	Nonsynonymus SNV		1
19	STK11	NM_000455.5	c.465-3C>T	-	Intronic SNV	rs587781619	3
17	TP53	NM_000546.6	c.672+6G>T	-	Splice site SNV	rs766856111	1
17	TP53	NM_000546.6	c.773A>G	p.(Glu258Gly)	Nonsynonymus SNV	rs1060501201	1
3	VHL	NM_000551.4	c.241C>T	p.(Pro81Ser)	Nonsynonymus SNV	rs104893829	1
14	XRCC3	NM_005432.4	c.520C>T	p.(Arg174Ter)	Stop-gain	rs56288529	1
14	XRCC3	NM_005432.4	c.887T>C	p.(Leu296Pro)	Nonsynonymus SNV	-	1
