# Supplementary material for: Whole genome profiling of 400 patients at risk for hereditary cancer in a Brazilian cohort
Source: Research Square preprint supplement (doi:10.21203/rs.3.rs-7104192/v1), 2025-08-22
Supplement: Supplementary file 3 [file de0a1f421720e1dfd173fdf3.xlsx]

## Sheet: Genetic findings
Supplementary Table S1. Summary of clinical, familial, and genomic features of sequenced probands
Patient	Sex	Race	Age at first diagnosis	Personal history	Family history	WGS result	Variant classification	Gene and transcript	Average Depth (x)	Bases covered above 10x (%)
1	F	Black	44	Breast cancer	Colorectal, prostate, pancreatic, gallbladder	Positive	P	PMS2 (NM_000535.7)	37	98.58
2	F	Brown	49	Breast cancer	Prostate, colorectal, uterus, liver, leukemia	Positive	P	BRIP1 (NM_032043)	27	98.3
3	F	White	33	Breast cancer	Breast, prostate	Positive	P	BRCA2 (NM_000059.4)	28	98.37
4	F	White	45	Breast and skin cancers	Breast, prostate	Positive	LP	BRCA2 (NM_000059.4)	19	96.81
5	F	Brown	29	Intestinal polyps	Stomach, colorectal, uterus	Positive	LP	STK11 (NM_000455.5)	25	98.19
6	F	Brown	39	Breast cancer	Breast, stomach	Positive	LP	CDH1 (NM_004360.5)	28	98.36
7	F	Brown	56	Breast cancer	Breast, colorectal, CNS	Positive	LP	CHEK2 (NM_007194.4)	36	98.62
8	F	Brown	39	Breast cancer	Breast, uterus	Positive	P	BRCA1(NM_007294.4)	35	98.62
9	F	Brown	34	Breast cancer	Breast	Positive	P	TP53(NM_000546.6)	47	98.69
10	F	Brown	74	Breast and ovarian cancers	Colorectal, mouth	Positive	P; VUS	RAD51C(NM_058216.3); TP53(NM_000546.6)	31	98.48
11	F	Brown	Infantile onset	Neurofibromatosis	Neurofibromatosis	Positive	P	NF1(NM_001042492.3)	52	98.72
12	F	Brown	46	Ovarian cancer	No family history	Positive	P	NTHL1 (NM_002528.7)	56	98.74
13	F	Brown	39	Breast cancer	Breast, throat, uterus, thyroid, prostate	Positive	P	BRCA1 (NM_007294.4)	38	98.64
14	F	No information	16	Kidney cancer	Colorectal, skin	Positive	LP; VUS	POLE (NM_006231.4); BRCA2 (NM_000059.4)	26	98.18
15	F	Brown	28	Colorectal cancer	Colorectal, stomach	Positive	P	APC (NM_000038.6)	25	98.26
16	M	Black	45	Paraganglioma	Uterus, gallbladder	Positive	P	SDHB (NM_003000.3)	27	98.25
17	F	Brown	34	Breast cancer	Stomach, colorectal, uterus	Positive	P	BRCA1(NM_007294.4)	42	98.62
18	M	Brown	Infantile onset	Neurofibromatosis	Uterus, prostate	Positive	2 LP	ANTXR2 (NM_058172.6)	55	99.5
19	M	Brown	34	Breast cancer	Breast, pancreatic, lung, prostate, colorectal, mouth, stomach	Positive	P	BRCA2 (NM_000059.4)	32	99.02
20	M	Brown	33	Colorectal cancer	Penile, prostate	Positive	LP	APC (NM_000038.6)	35	99.17
21	F	Brown	38	Breast cancer	Breast, colorectal	Positive	P	BRCA1 (NM_007294.4)	43	98.68
22	F	Brown	29	Thyroid cancer and instestinal polyps	Intestinal polyps, uterus	Positive	P	APC (NM_000038.6)	25	98.14
23	F	Brown	51	Pancreatic cancer	Breast	Positive	P	BRCA2 (NM_000059.4)	32	98.51
24	F	Brown	36	Breast cancer	Breast	Positive	P	BRCA1 (NM_007294.4)	38	98.61
25	M	Black	Infantile onset	Neurofibromatosis	Breast	Positive	P	NF1(NM_001042492.3)	34	99.08
26	M	Brown	19	Colorectal cancer	No family history	Positive	LP	TP53 (NM_000546.6)	39	99.31
27	F	Brown	36	Breast cancer	Breast, thyroid, skin, uterus	Positive	P	BRCA1 (NM_007294.4)	26	98.29
28	F	Brown	45	Breast cancer	Colorectal	Positive	LP	MITF (NM_000248.4)	36	98.57
29	F	Brown	33	Breast cancer	Colorectal, ovary, pancreatic, thyroid, prostate, leukemia	Positive	P	BRCA2 (NM_000059.4)	34	98.51
30	F	Black	38	Breast cancer	Neurofibromatosis, uterus	Positive	P; VUS	NF1 (NM_001042492.3); BRIP1 (NM_032043.3)	47	98.69
31	F	Black	45	Breast cancer	No information	Positive	LP	FANCI (NM_001113378.2)	39	98.61
32	F	Brown	39	Breast cancer	Breast, ovary, prostate	Positive	2 LP	BRCA1 (NM_007294.4); seq[GRCh38] del(16)(q24.3q24.3) NC_000016.10:g.(89735837_89807671)del	45	98.64
33	F	Brown	40	Breast cancer	Spinal cord	Positive	P	BRCA2 (NM_000059.4)	31	98.47
34	F	Brown	92	Kidney cancer	No information	Positive	P; VUS	ATM (NM_000051.4); NPR2 (NM_003995.4)	54	98.77
35	F	Brown	42	Breast cancer	Breast, prostate, lymphoma	Positive	P	BRCA2 (NM_000059.4)	30	98.38
36	M	Brown	Infantile onset	Xeroderma pigmentosum	No family history	Positive	P	XPC (NM_004628.5)	63	99.56
37	F	White	33	Breast cancer	Breast	Positive	LP	RAD51C (NM_058216.3)	42	98.67
38	F	Black	52	Breast cancer	Breast, lung	Positive	LP	CDH1 (NM_004360.5)	50	98.70
39	F	Brown	18	Thyroid cancer and instestinal polyps	Thyroid	Positive	2 P	MUTYH (NM_001048174.2), BRCA2 (NM_000059.4)	39	98.65
40	F	Brown	56	Bilateral breast cancer and ovarian cancer	Breast, neck	Positive	LP	BRCA1 (NM_007294.4)	74	98.80
41	F	Brown	42	Breast cancer	Breast	Positive	P	BRCA1 (NM_007294.4)	29	98.37
42	F	Brown	33	Breast cancer	Breast, ovary, prostate	Positive	P	BRCA2 (NM_000059.4)	37	98.55
43	F	Brown	46	Breast cancer	Colorectal, bladder, stomach	Positive	LP	MSH6 (NM_000179.3)	31	98.43
44	F	Brown	50	Breast cancer	Breast, stomach	Positive	P; LP	BRCA2 (NM_000059.4), ATM(NM_000051.4)	40	98.58
45	F	Brown	30	Breast cancer and osteosarcoma	No family history	Positive	P	TP53 (NM_000546.6)	37	98.57
46	F	Brown	39	Breast cancer	Breast	Positive	P	BRCA1 (NM_007294.4)	31	98.51
47	F	Brown	66	Breast cancer	Breast, prostate, throat, thyroid	Positive	P	PALB2 (NM_024675.4)	38	98.66
48	F	Brown	35	Breast cancer	Breast, prostate, skin, stomach, leukemia	Positive	P	BRCA2 (NM_000059.4)	31	98.47
49	F	White	39	Breast cancer	Breast, ovary, lung	Positive	P	BRCA2 (NM_000059.4)	48	98.69
50	F	Brown	50	Breast cancer	Breast, liver, prostate, colorecta, stomach	Positive	LP	RET (NM_020975.6)	39	98.63
51	F	Brown	46	Colorectal cancer	Colorectal, stomach	Positive	LP	MLH1 (NM_000249.4)	36	98.58
52	F	Black	36	Bilateral breast cancer	Breast, lung	Positive	P	BRCA2 (NM_000059.4)	34	98.59
53	F	Brown	59	Breast cancer	Breast, stomach	Positive	2 P	BRCA2 (NM_000059.4), MUTYH (NM_001048174.2)	45	98.63
54	F	Brown	50	Paraganglioma	No family history	Positive	P	SDHB (NM_003000.3)	27	98.31
55	F	Brown	59	Breast cancer	Breast, CNS	Positive	P	PALB2 (NM_024675.4)	34	98.48
56	F	Brown	50	Breast and ovarian cancers	Breast, prostate, ovary, throat, laryngeal	Positive	P	BRCA1 (NM_007294.4)	26	98.32
57	F	Brown	46	Breast cancer	Breast, uterus, leukemia	Positive	P	BRCA1 (NM_007294.4)	28	98.3
58	F	White	54	Breast cancer	Breast, thyroid, skin, lung, prostate	Positive	P	PALB2 (NM_024675.4)	48	98.67
59	M	Black	45	Colorectal cancer	Colorectal, CNS	Positive	P	MLH1 (NM_000249.4)	46	99.42
60	F	Brown	34	Breast cancer	Breast, colorectal, endometrial	Positive	LP	NF1 (NM_001042492.3)	44	98.65
61	F	Brown	33	Bilateral breast cancer	Ovary, uterus	Positive	LP	BRCA2 (NM_000059.4)	37	98.59
62	F	Brown	48	Colorectal and endometrial cancer	Colorectal, endometrious	Positive	LP	MSH6 (NM_000179.3)	34	98.55
63	M	Brown	38	Colorectal cancer	Thyroid, prostate, throat, laryngeal, colorectal	Positive	P	MLH1 (NM_000249.4)	42	99.4
64	F	Brown	43	Breast and ovarian cancers	Breast, uterus, CNS	Positive	P	BRCA1 (NM_007294.4)	47	98.67
65	F	Brown	29	Breast cancer	Breast, throat, colorectal, skin, leukemia	Positive	2 P	BRCA1 (NM_007294.4), BRCA2 (NM_000059.4)	43	98.59
66	F	Brown	37	Breast cancer	Breast	Positive	P	BRCA1 (NM_007294.4)	36	98.56
67	F	Asian	52	Breast cancer	Stomach, throat, prostate, skin	Positive	P	FANCM (NM_020937.4)	28	98.35
68	F	Brown	45	Breast cancer	Breast, thyroid	Positive	P	BRCA1 (NM_007294.4)	59	98.76
69	F	White	32	Breast cancer	No family history	Positive	LP; 2 VUS	CHEK2 (NM_007194.4), CHEK2 (NM_007194.4), BRCA2 (NM_000059.4)	31	98.49
70	M	Black	Infantile onset	Neurofibromatosis	Neurofibromatosis	Positive	LP	NF1 (NM_001042492.3)	47	99.42
71	F	Brown	24	Breast cancer	Breast, sarcoma	Positive	LP	TP53 (NM_000546.6)	35	98.51
72	F	No information	41	Breast cancer	Breast, prostate, stomach	Positive	P; VUS	ATM (NM_000051.4), VHL (NM_000551.4)	38	98.61
73	F	Brown	32	Breast cancer	Uterus, prostate	Positive	P	CHEK2 (NM_007194.4)	34	98.53
74	F	Brown	59	Breast cancer	Breast, uterus	Positive	LP	ATM (NM_000051.4)	48	98.7
75	F	Brown	42	Breast cancer	Breast	Positive	LP	BARD1 (NM_000465.4)	45	98.68
76	F	Brown	38	Esophageal cancer	Breast, thyroid, uterus	Positive	P	BRCA2 (NM_000059.4)	30	98.42
77	F	Brown	38	Breast cancer	Breast, lung, uterus e colorectal	Positive	P	BRCA1 (NM_007294.4)	50	98.73
78	F	Brown	26	Breast, bone and lung cancers	Breast, skin	Inconclusive	VUS	NTHL1 (NM_002528.7)	47	98.69
79	F	Brown	35	Breast cancer	Colorectal	Inconclusive	LP	RAD50 (NM_005732.4)	37	98.59
80	F	Brown	46	Breast cancer	Breast	Inconclusive	LP	XRCC2 (NM_005431.2)	43	98.63
81	F	Brown	55	Breast cancer	Breast, uterus, thyroid, lung, ovary	Inconclusive	2 VUS	BRCA2 (NM_000059.4); BRCA2 (NM_000059.4)	25	98.24
82	F	White	42	Breast cancer	Breast, colorectal, ovary, stomach, skin, lung, prostate, pancreas, leukemia	Inconclusive	VUS	CHEK2 (NM_007194.4)	49	98.7
83	F	Brown	43	Thyroid cancer	Breast, prostate, skin, stomach	Inconclusive	2 VUS	TG(NM_003235.5); BRCA2(NM_000059.4)	33	98.51
84	F	Black	29	Ovarian cancer	No family history	Inconclusive	LP; VUS	LZTR1 (NM_006767.4); MSH2 (NM_000251.3)	33	98.58
85	F	White	59	Bilateral breast cancer	Breast, thyroid, ovary, leukemia	Inconclusive	VUS	PALB2(NM_024675.4)	30	98.51
86	F	Brown	41	Breast cancer	Breast, prostate, lung, skin, uterus	Inconclusive	2 VUS	MSH3 (NM_002439.5); PALB2 (NM_024675.4)	42	98.68
87	F	White	36	Breast cancer	No family history	Inconclusive	2 VUS	ATM(NM_000051.4); STK11(NM_000455.5)	35	98.55
88	F	White	39	Breast cancer	Prostate, kidney, throat, uterus	Inconclusive	VUS	STK11 (NM_000455.5)	47	98.69
89	F	Brown	35	Breast cancer	Breast, uterus, throat, leukemia, sarcoma	Inconclusive	VUS	POLD1 (NM_002691.4)	38	98.61
90	F	Brown	38	Breast cancer	Breast, prostate, lung, testicular, CNS	Inconclusive	VUS	PALB2 (NM_024675.4); FLCN (NM_144997.7); RECQL4 (NM_004260.4)	53	98.71
91	F	Brown	39	Breast cancer	Prostate, skin, stomach	Inconclusive	VUS	APC (NM_000038.6)	27	98.4
92	F	Brown	33	Breast cancer	Breast, lung, colorectal	Inconclusive	VUS	XRCC3 (NM_005432.4)	37	98.61
93	F	Brown	24	Breast cancer, lung cancer, sarcoma	Breast, skin	Inconclusive	VUS	EPCAM (NM_002354.3)	32	98.51
94	F	Brown	69	Bilateral ovarian cancer	Stomach, prostate, thyroid, liver	Inconclusive	P	MUTYH (NM_001048174.2)	29	98.44
95	F	Brown	37	Stomach cancer	Breast, thyroid, testicular, pancreatic, stomach, colorectal, sarcoma	Inconclusive	VUS	BARD1 (NM_000465.4)	39	98.62
96	F	Brown	36	Breast cancer	Breast, throat	Inconclusive	VUS	BRCA1 (NM_007294.4)	31	98.47
97	F	Brown	40	Breast cancer	Mouth	Inconclusive	VUS	XRCC3 (NM_005432.4)	38	98.57
98	F	Brown	37	Breast cancer	Breast, prostate, lymphoma, liver, osteosarcoma	Inconclusive	VUS	POLE (NM_006231.4)	24	98.19
99	F	Brown	27	Colorectal cancer	Breast, prostate, colorectal, thyroid, lung	Inconclusive	VUS	RAD51D (NM_002878.3)	48	98.72
100	F	Brown	43	Breast cancer	Breast, prostate	Inconclusive	VUS	GNAS (NM_080425.3)	50	98.71
101	F	Brown	42	Breast and thyroid cancers	Lung	Inconclusive	VUS	CHEK2 (NM_007194.4)	29	98.4
102	F	Brown	32	Breast cancer	Breast, prostate	Inconclusive	LP; VUS	NTHL1 (NM_002528.7); NTHL1 (NM_002528.7)	35	98.58
103	F	Black	48	Bilateral breast cancer	Prostate	Inconclusive	LP	SDHB(NM_003000.3)	29	98.42
104	M	Black	42	Colorectal cancer	Brain, lung	Inconclusive	3 VUS	MLH1(NM_000249.4); POLE(NM_006231.4); SMAD4 (NM_005359.6)	36	99.2
105	F	Black	53	Breast cancer	Breast, lymphoma	Inconclusive	VUS	BAP1 (NM_004656.4)	35	98.52
106	F	Black	46	Breast cancer	Colorectal, lung, prostate	Inconclusive	VUS	MSH2 (NM_000251.3)	46	98.63
107	F	Brown	50	Breast cancer	Prostate, melanoma	Inconclusive	VUS	ATR (NM_001184.4)	40	98.65
108	F	Brown	40	Breast cancer	Breast, skin	Inconclusive	VUS	PALB2 (NM_024675.4)	42	98.63
109	F	Black	43	Breast cancer	No family history	Inconclusive	VUS	MSH2 (NM_000251.3)	36	98.53
110	F	Black	34	Breast cancer	Breast, melanoma	Inconclusive	2 VUS	ABRAXAS1 (NM_139076.3)	45	98.64
111	F	Brown	40	Kidney cancer	Breast, thyroid, leukemia, stomach, liver	Inconclusive	VUS	APC (NM_000038.6)	43	98.67
112	F	White	28	Ovarian cancer	Ovary, leukemia, lymphoma, skin	Inconclusive	VUS	ATM (NM_000051.4)	30	98.48
113	F	Brown	36	Breast cancer	Breast, prostate, leukemia	Inconclusive	VUS	BARD1 (NM_000465.4)	26	98.23
114	F	Brown	41	Breast cancer	Bladder	Inconclusive	VUS	BRCA2 (NM_000059.4)	35	98.54
115	F	Brown	40	Breast and thyroid cancers	Breast, prostate, stomach	Inconclusive	VUS	BRCA2 (NM_000059.4)	33	98.51
116	F	Brown	35	Breast cancer	Breast	Inconclusive	2 VUS	ATM (NM_000051.4); MLH3 (NM_001040108.2)	51	98.71
117	F	Brown	45	Breast cancer	Breast, colorectal, mouth, stomach	Inconclusive	P; VUS	FANCA (NM_000135.4); NF1 (NM_001042492.3)	27	98.33
118	F	Black	29	Breast cancer	Pancreatic, skin	Inconclusive	VUS	ATM (NM_000051.4)	33	98.57
119	F	Black	31	Breast cancer	Breast	Inconclusive	VUS	MSH2 (NM_000251.3)	33	98.54
120	F	Brown	35	Breast cancer	Breast, brain, prostate, colorectal, sarcoma	Inconclusive	VUS	MLH1 (NM_000249.4)	30	98.47
121	F	Brown	32	Adrenocortical carcinoma	Uterus, prostate, sarcoma	Inconclusive	LP	XRCC2 (NM_005431.2)	40	98.53
122	F	Black	32	Breast cancer	Breast, liver, colorectal	Inconclusive	VUS	PTCH2 (NM_003738.5)	39	98.6
123	F	Brown	35	Breast cancer	No information	Inconclusive	2 VUS	BRCA2 (NM_000059.4); POLE (NM_006231.4)	42	98.65
124	M	Brown	42	Breast cancer	Leukemia	Inconclusive	VUS	CHD3 (NM_001005273.3)	44	99.41
125	F	Brown	64	Breast and endometrial cancers	Breast	Inconclusive	2 VUS	BAP1 (NM_004656.4); FANCA (NM_000135.4)	54	98.75
126	F	Brown	34	Breast cancer	Breast, colorectal, penile, myeloma, liposarcoma	Inconclusive	VUS	PALB2 (NM_024675.4)	34	98.48
127	F	Brown	40	Breast cancer	No family history	Inconclusive	VUS	MSH6 (NM_000179.3)	37	98.63
128	F	Brown	25	Breast cancer	Stomach, ovary	Inconclusive	P	MUTYH (NM_001048174.2)	35	98.51
129	F	Black	36	Breast cancer	Pancreas, uterus	Inconclusive	VUS	MSH6 (NM_000179.3)	42	98.65
130	F	Brown	59	Breast cancer	Breast, leukemia	Inconclusive	VUS	ATR (NM_001184.4)	38	98.6
131	F	Brown	39	Colorectal cancer	Colorectal	Inconclusive	5 VUS	BRCA2 (NM_000059.4); BRCA2 (NM_000059.4); SDHA (NM_004168.4); POLD1 (NM_001256849); RECQL4 (NM_004260.4)	29	98.48
132	F	Black	32	Stomach cancer	Prostate, throat, CNS, pancreas	Inconclusive	VUS	CDKN2A (NM_000077.5)	40	98.63
133	F	Brown	48	Breast cancer	Liver	Inconclusive	2 VUS	MSH2(NM_000251.3); RNF43(NM_017763.6)	50	98.66
134	F	Black	35	Breast cancer	Stomach, pacreas	Inconclusive	VUS	APC (NM_000038.6)	34	98.56
135	F	Brown	37	Breast cancer	Breast, thyroid, uterus	Inconclusive	VUS	PALB2 (NM_024675.4)	35	98.58
136	F	Brown	45	Breast cancer	Prostate, uterus, CNS, skin	Inconclusive	2 VUS	TP53 (NM_000546.6); POLE (NM_006231.4)	45	98.67
137	F	Brown	55	Breast cancer	Breast, prostate, CNS	Inconclusive	VUS	MSH6 (NM_000179.3)	41	98.64
138	F	Brown	41	Breast cancer	No family history	Inconclusive	2 VUS	POLD1 (NM_002691.4); APC (NM_000038.6)	36	98.57
139	F	Brown	42	Breast cancer	Prostate, bladder, stomach	Inconclusive	3 VUS	RAD50 (NM_005732.4); CHEK2 (NM_007194.4); CDKN2A (NM_058195.4)	32	98.45
140	F	Brown	52	Thyroid and stomach cancers	Breast, uterus, ovary, colorectal, stomach, liver, lung	Inconclusive	VUS	BRCA2 (NM_000059.4)	52	98.72
141	F	Brown	60	Breast cancer	Breast, colorectal, prostate	Inconclusive	VUS	CHEK2 (NM_007194.4)	33,84	100
142	F	Black	40	Breast cancer	Stomach, uterus	Inconclusive	VUS	MSR1 (NM_002445.4)	34	98.49
143	F	Black	29	Breast cancer	No family history	Inconclusive	LP	POLH (NM_006502.3)	32	98.52
144	F	Brown	37	Breast cancer	Breast, prostate, uterus, throat	Inconclusive	VUS	ATM (NM_000051.4)	34	98.52
145	F	Brown	46	Breast cancer	Prostate, stomach, liver, kidney, throat	Inconclusive	VUS	CDH1 (NM_004360.5)	36	98.58
146	F	Brown	39	Breast cancer	Skin	Inconclusive	VUS	BRIP1 (NM_032043.3)	41	98.65
147	F	Brown	43	Breast cancer	Prostate	Inconclusive	VUS	ATR (NM_001184.4)	21	97.63
148	F	Brown	43	Colorectal and liver cancers	Breast, liver, ovary, penile, leukemia prostate, CNS	Inconclusive	VUS	MSH2 (NM_000251.3)	38	98.6
149	F	Brown	56	Bilateral breast cancer	Breast, prostate, colorectal, stomach, CNS, throat	Inconclusive	3 VUS	PALB2 (NM_024675.4); FANCA (NM_000135.4); STK11 (NM_000455.5)	29	98.43
150	F	Brown	33	Breast cancer	Breast	Inconclusive	VUS	BRCA1 (NM_007294.4)	31	98.46
151	F	Brown	31	Breast cancer	Kidney, glioma	Inconclusive	LP	POLH (NM_006502.3)	23	98.09
152	F	Brown	26	Colorectal cancer	Lung, uterus, prostate	Inconclusive	VUS	APC (NM_000038.6)	39	98.6
153	F	White	52	Breast cancer	Breast, lymphoma, colorectal, prostate, pancreatic, thyroid	Inconclusive	VUS	RAD54L (NM_003579.4)	45	98.69
154	F	Brown	45	Breast cancer	Breast, skin, uterus, laryngeal, throat	Inconclusive	VUS	POT1 (NM_015450.3)	29	98.42
155	F	Brown	59	Breast cancer	Breast, liver, prostate, leukemia	Inconclusive	VUS	ATM (NM_000051.4)	43	98.64
156	F	Brown	32	Breast cancer	No family history	Inconclusive	VUS	ATM (NM_000051.4)	52	98.68
157	F	Brown	45	Ovarian cancer	Uterus	Inconclusive	VUS	CHEK2 (NM_007194.4)	36	98.58
158	F	Brown	45	Thyroid cancer	Breast, colorecta, liver, pancreas	Inconclusive	VUS	HABP2 (NM_004132.5)	32	98.51
159	F	Brown	59	Breast cancer	Breast, uterus, pancreatic, prostate, kidney, lung, liver	Inconclusive	VUS	HMMR (NM_012484.3)	43	98.64
160	F	Black	43	Breast cancer	Breast, pancreatic, uterus, liver	Inconclusive	VUS	ATM (NM_000051.4)	38	98.58
161	F	Brown	40	Breast cancer	No family history	Inconclusive	VUS	MSH6 (NM_000179.3)	47	98.76
162	F	Black	47	Breast cancer	CNS	Inconclusive	VUS	ATR (NM_001184.4)	37	98.57
163	F	White	30	Breast cancer	Breast, prostate, leukemia	Inconclusive	VUS	MSR1 (NM_002445.4)	37	98.6
164	F	Brown	32	Breast cancer	Breast, prostate, esophageal, uterus, sarcoma	Inconclusive	2 VUS	NBN (NM_002485.5); RAD51C (NM_058216.3)	60	98.76
165	F	Brown	37	Breast cancer	Breast, stomach, prostate, CNS	Inconclusive	VUS	BRCA2 (NM_000059.4)	31	98.47
166	F	Brown	37	Breast cancer	Breast, prostate, stomach	Inconclusive	VUS	RNF43 (NM_017763.6)	35	98.57
167	F	Brown	32	Breast cancer	No family history	Inconclusive	VUS	BRCA1 (NM_007294.4)	38	98.60
168	F	Brown	55	Breast cancer	Breast, colorectal, ovary, leukemia	Inconclusive	VUS	CDH1 (NM_004360.5)	33	98.44
169	F	Brown	40	Breast cancer	Stomach, esophageal, neck, prostate, bone, leukemia	Inconclusive	VUS	HMMR (NM_001142556.2)	31	98.48
170	F	Brown	29	Breast cancer	No information	Inconclusive	VUS	BRCA2 (NM_000059.4)	33	98.5
171	F	Black	28	Ovarian cancer	Breast, uterus	Inconclusive	P	MUTYH (NM_001048174.2)	38	98.6
172	F	Brown	55	Breast cancer	Breast, ovary, pancreas, leukemia	Inconclusive	VUS	RET (NM_020975.6)	42	98.64
173	F	Brown	77	Ovarian cancer	Colorectal, lung, prostate	Inconclusive	VUS	RECQL (NM_002907.4)	47	98,68
174	F	Brown	72	Bilateral breast cancer	Colorectal, ovary	Inconclusive	VUS	PALB2 (NM_024675.4)	37	98.58
175	F	Brown	47	Breast cancer	Breast	Inconclusive	2 VUS	POLE (NM_006231.4); PKD1 (NM_001009944.3)	23	97.83
176	F	White	37	Breast cancer	Breast	Inconclusive	P; 2 VUS	MUTYH (NM_001128425.2); MUTYH (NM_001128425.2); STK11 (NM_000455.5)	31	98.52
177	F	Brown	30	Breast cancer	Breast, prostate	Inconclusive	3 VUS	ATM (NM_000051.4); BRIP1 (NM_032043.3); AXIN2 (NM_004655.4)	43	98.63
178	F	Brown	37	Colorectal cancer	No family history	Inconclusive	VUS	RET (NM_020975.6)	41	98.6
179	F	Black	38	Breast cancer	Breast, thyroid, lung, tracheal	Inconclusive	P; 2 VUS	MSH3 (NM_002439.5); LZTR1 (NM_006767.4); BRCA2 (NM_000059.4)	46	98.68
180	F	Brown	40	Breast cancer	Stomach, mouth, lymphoma	Inconclusive	VUS	CHEK2 (NM_007194.4)	40	98.65
181	F	White	58	Stomach cancer	Leukemia, pancreas, stomach, prostate, liver	Negative	-	-	37	98.56
182	M	Brown	55	Prostate cancer	Kidney, uterus, prostate, leg, neck, thyroid, CNS	Negative	-	-	29	98.68
183	F	Black	39	Breast cancer	Breast	Negative	-	-	51	98.72
184	F	White	35	Breast cancer	No family history	Negative	-	-	40	98.66
185	F	Brown	38	Breast cancer	Pancreas, prostate, kidney, skin	Negative	-	-	37	98.56
186	F	Brown	28	Breast cancer	No family history	Negative	-	-	27	98.28
187	F	White	49	Breast and thyroid cancer	Thyroid, skin	Negative	-	-	51	98.7
188	F	Brown	46	Breast cancer	Breast, pancreas, skin	Negative	-	-	36	98.57
189	F	Brown	38	Breast cancer	Breast, prostate, thyroid	Negative	-	-	50	98.75
190	F	Brown	41	Breast cancer	Prostate	Negative	-	-	45	98.69
191	F	Brown	50	Breast cancer	Breast, uterus, bone	Negative	-	-	39	98.62
192	F	Black	36	Breast cancer	Throat, leukemia	Negative	-	-	39	98.58
193	F	No information	32	Breast cancer	Liver	Negative	-	-	31	98.42
194	F	Black	41	Breast cancer	Uterus, lymphoma, peritoneum	Negative	-	-	43	98.58
195	F	Brown	31	Breast cancer	Breast, uterus, esophagus, ovary	Negative	-	-	44	98.68
196	F	Brown	36	Breast cancer	Prostate, uterus, throat, esophagus	Negative	-	-	40	98.61
197	F	Brown	43	Ovarian cancer	Prostate, stomach, uterus	Negative	-	-	40	98.62
198	F	Brown	45	Breast cancer	Breast, liver	Negative	-	-	33	98.57
199	F	Brown	40	Breast cancer	No family history	Negative	-	-	38	98.6
200	F	Brown	47	Breast cancer	Breast, CNS	Negative	-	-	38	98.63
201	F	Brown	31	Breast cancer	No family history	Negative	-	-	44	98.65
202	F	Brown	35	Breast cancer	Breast, skin, prostate, gallbladder, colorectal, uterus	Negative	-	-	37	98.62
203	F	White	33	Breast cancer	Colorectal, prostate	Negative	-	-	34	98.57
204	F	Black	37	Breast and ovarian cancers	Prostate	Negative	-	-	35	98.47
205	F	Brown	50	Breast cancer	Breast, stomach, leukemia, prostate, skin	Negative	-	-	37	98.59
206	F	Black	49	Bilateral breast cancer	Prostate, uterus, mouth, leukemia	Negative	-	-	38	98.55
207	F	Brown	49	Breast and skin cancers	Breast, skin	Negative	-	-	39	98.65
208	F	Black	42	Breast cancer	Breast	Negative	-	-	32	98.43
209	F	Brown	26	Ovarian cancer	No family history	Negative	-	-	41	98.62
210	F	Brown	29	Breast cancer	Esophagus, prostate	Negative	-	-	42	98.62
211	F	White	30	Breast cancer	Breast, skin, CNS, colorectal, prostate, lung, liver	Negative	-	-	38	98.58
212	F	Brown	29	Breast cancer	Prostate	Negative	-	-	38	98.55
213	F	Brown	28	Breast cancer	Breast	Negative	-	-	46	98.73
214	F	Black	35	Breast cancer	Breast	Negative	-	-	34	98.5
215	F	Brown	57	Breast cancer	Breast, prostate, mediastinum	Negative	-	-	49	98.73
216	F	Brown	37	Breast cancer	Breast	Negative	-	-	46	98.75
217	F	White	38	Breast cancer	Breast, uterus, thyroid, lung, skin, prostate, liver	Negative	-	-	31	98.5
218	F	Brown	30	Breast cancer	Breast, ovary, prostate, colorectal, skin	Negative	-	-	24	98.21
219	F	Brown	36	Breast cancer	No family history	Negative	-	-	35	98.48
220	F	Brown	43	Ovarian cancer	Prostate, uterus, skin	Negative	-	-	33	98.51
221	F	Brown	53	Breast cancer	Uterus, liver	Negative	-	-	47	98.69
222	M	White	60	Stomach and prostate	Breast, colorectal, liver, prostate	Negative	-	-	31	98.82
223	F	Brown	36	Bilateral breast cancer	Breast, prostate	Negative	-	-	47	98.59
224	F	Brown	35	Breast cancer	Breast, colorectal	Negative	-	-	34	98.53
225	F	White	31	Breast cancer	Stomach, lymphoma	Negative	-	-	24	98.13
226	F	Black	32	Breast cancer	Breast	Negative	-	-	34	98.46
227	F	Brown	41	Breast cancer	Breast, prostate	Negative	-	-	42	98.67
228	F	Black	35	Breast cancer	Liver	Negative	-	-	44	98.69
229	F	Brown	40	Breast cancer	No family history	Negative	-	-	55	98.71
230	F	Brown	41	Breast cancer	Breast	Negative	-	-	37	98.62
231	F	Brown	32	Breast cancer	Esophagus, prostate, colorectal	Negative	-	-	24	98.05
232	F	No information	31	Colorectal cancer	Thyroid	Negative	-	-	32	98.56
233	F	Brown	52	Breast cancer	No family history	Negative	-	-	33	98.55
234	F	Black	54	Breast cancer	Skin	Negative	-	-	44	98.66
235	F	Brown	43	Breast cancer	Stomach	Negative	-	-	38	98.62
236	F	Brown	33	Breast cancer	Breast, skin	Negative	-	-	20	97.38
237	F	White	32	Breast and thyroid cancers	Thyroid, skin	Negative	-	-	33	98.51
238	F	Brown	46	Breast cancer	Uterus, breast, prostate	Negative	-	-	25	98.1
239	F	Brown	36	Colorectal cancer	Colorectal, lung, uterus, kidney, skin, prostate, CNS, liver, trachea, neck	Negative	-	-	32	98.51
240	F	Brown	39	Ovarian and endometrial cancer	Colorectal, uterus, pharynx	Negative	-	-	22	97.58
241	F	Brown	42	Breast cancer	Breast, colorectal, lung, prostate, throat, leukemia	Negative	-	-	42	98.66
242	F	White	45	Breast and skin cancers	Colorectal, prostate, skin, breast, leukemia	Negative	-	-	33	98.52
243	F	White	51	Breast cancer	Breast, olorectal, lung, skin, prostate	Negative	-	-	31	98.45
244	F	Brown	36	Breast cancer	Breast	Negative	-	-	33	98.47
245	F	White	42	Breast cancer	Breast, leukemia	Negative	-	-	26	98.3
246	F	Brown	59	Breast cancer	Breast, lung, mediastinum, leukemia	Negative	-	-	36	98.54
247	F	Brown	36	Breast cancer	No family history	Negative	-	-	34	98.45
248	F	Black	37	Breast cancer	Breast, ovary	Negative	-	-	45	98.69
249	F	Brown	47	Breast cancer	Breast, uterus	Negative	-	-	63	98.83
250	F	Brown	70	Breast cancer	Breast, stomach	Negative	-	-	37	98.55
251	M	Brown	18	Synovial sarcoma	Breast, Stomach, prostate	Negative	-	-	22	96.76
252	F	Brown	45	Breast cancer	Neck	Negative	-	-	37	98.59
253	F	White	32	Breast cancer	Breast, prostate, lung, leukemia	Negative	-	-	32	98.54
254	F	Brown	31	Breast cancer	Breast, ovary, throat	Negative	-	-	39	98.63
255	F	Black	38	Breast cancer	Breast, skin, uterus	Negative	-	-	43	98.65
256	M	Brown	45	Colorectal cancer	Colorectal	Negative	-	-	42	99.38
257	F	Brown	34	Breast cancer	Breast, stomach, prostate, esophagus, uterus	Negative	-	-	34	98.54
258	F	Black	28	Breast cancer	Uterus	Negative	-	-	25	98.28
259	F	Brown	37	Breast cancer	No family history	Negative	-	-	25	98.04
260	F	Brown	53	Bilateral breast cancer	Prostate, thyroid	Negative	-	-	37	98.58
261	F	Black	27	Breast cancer	Breast, lung, pancreas, ovary	Negative	-	-	23	97.97
262	F	Brown	44	Bilateral breast cancer	No family history	Negative	-	-	48	98.66
263	F	Brown	51	Breast cancer	Breast, stomach, prostate, colorectal	Negative	-	-	31	98.48
264	F	Brown	31	Breast cancer	Uterus, leukemia, prostate, thyroid	Negative	-	-	37	98.59
265	F	Brown	50	Breast cancer	Breast, lung, lymphoma, skin	Negative	-	-	42	98.64
266	F	Brown	49	Ovarian cancer	Colorectal	Negative	-	-	42	98.62
267	F	Black	49	Breast cancer	Breast, prostate, colorectal, larynx	Negative	-	-	30	98.36
268	F	Brown	60	Colorectal cancer	Pancreas, uterus, CNS, breast, intestinal polyps	Negative	-	-	40	98.63
269	F	Brown	47	Thyroid cancer	Breast, prostate, thyroid	Negative	-	-	46	98.67
270	F	Brown	52	Breast and colorectal cancers	Colorectal, prostate, lung, skin, pancreas	Negative	-	-	47	98.71
271	F	Brown	54	Breast cancer	Breast	Negative	-	-	33	98.49
272	F	Black	29	Breast cancer	Breast, esophagus	Negative	-	-	37	98.54
273	F	Brown	45	Breast cancer	Uterus, throat	Negative	-	-	58	98.76
274	F	Brown	57	Breast cancer	Breast, liver	Negative	-	-	37	98.57
275	F	Brown	36	Breast cancer	Breast, uterus	Negative	-	-	27	98.32
276	F	Brown	34	Breast cancer	No family history	Negative	-	-	50	98.63
277	F	Brown	21	Breast cancer	Breast, lung, prostate	Negative	-	-	44	98.65
278	F	Black	32	Breast cancer	uterus, throat, leukemia	Negative	-	-	29	98.42
279	F	Brown	60	Breast cancer	Breast	Negative	-	-	34	98.54
280	F	Black	40	Stomach cancer	No family history	Negative	-	-	22	97.88
281	F	White	37	Ovarian cancer	Breast, colorectal	Negative	-	-	52	98.73
282	F	Brown	41	Breast cancer	Breast, bone	Negative	-	-	56	98.73
283	F	Brown	47	Breast, pancreatic and liver cancer	Pancreas	Negative	-	-	37	98.55
284	F	Brown	46	Breast cancer	Breast, prostate, uterus, liver	Negative	-	-	39	98.61
285	F	Brown	36	Breast cancer	Mouth, breast	Negative	-	-	39	98.53
286	F	Black	16	Breast cancer	Lung, lymphoma, breast, CNS, stomach	Negative	-	-	37	98.58
287	F	Brown	37	Breast cancer	Breast, CNS, skin, colorectal, liver, uterus	Negative	-	-	28	98.37
288	F	Brown	42	Breast cancer	Liver, prostate	Negative	-	-	44	98.66
289	F	Brown	44	Breast cancer	Breast, prostate, kidney	Negative	-	-	37	98.57
290	F	Brown	42	Breast cancer and melanoma	Uterus, breast	Negative	-	-	45	98.63
291	F	Brown	39	Breast cancer	Lung	Negative	-	-	37	98.6
292	F	Brown	28	Breast cancer	Breast	Negative	-	-	24	98.14
293	F	Brown	40	Breast cancer	Uterus, colorectal, leukemia, prostate, lung	Negative	-	-	31	98.45
294	F	Brown	33	Breast cancer	Breast	Negative	-	-	48	98.69
295	F	Yellow	31	Breast cancer	Breast, prostate, skin, uterus, stomach, colorectal, CNS, leukemia, bladder	Negative	-	-	42	98.59
296	F	Brown	26	Stomach cancer	Uterus, thyroid, lymphoma, stomach	Negative	-	-	37	98.56
297	F	Brown	26	Breast cancer	Breast	Negative	-	-	44	98.60
298	F	Brown	38	Breast cancer	Prostate, breast, colorectal	Negative	-	-	36	98.59
299	F	Brown	43	Breast cancer	Lung, leukemia, uterus	Negative	-	-	28	98.44
300	F	Brown	49	Bilateral breast cancer	Breast, leukemia, skin, liver, stomach	Negative	-	-	34	98.53
301	F	Brown	48	Breast cancer	Breast, prostate, stomach, ovary	Negative	-	-	37	98.53
302	F	Brown	32	Breast cancer	Breast, skin, uterus, lung	Negative	-	-	39	98.67
303	F	Brown	49	Breast cancer	Breast, ovary	Negative	-	-	41	98.67
304	F	Black	31	Breast cancer	Pancreas, prostate	Negative	-	-	30	98.41
305	F	Brown	45	Ovarian cancer	Uterus	Negative	-	-	33	98.51
306	F	Brown	37	Breast cancer	Colorectal, skin, liver, prostate, thyroid, stomach	Negative	-	-	19	96.67
307	F	Brown	47	Breast cancer	Uterus, prostate, liver, breast	Negative	-	-	48	98.68
308	F	Brown	36	Breast cancer	No information	Negative	-	-	41	98.59
309	F	White	36	Breast cancer	Breast, abdomen	Negative	-	-	38	98.64
310	F	Brown	33	Breast cancer	Breast, bone	Negative	-	-	48	98.71
311	F	Brown	34	Breast cancer	Skin, leukemia	Negative	-	-	45	98.71
312	F	Brown	46	Breast cancer	Breast, esophagus, ovary, uterus, prostate, myeloma, neuroendocrine	Negative	-	-	22	97.89
313	M	Brown	39	Breast cancer	Colorectal, myeloma, glioblastoma, prostate, lymphoma, intestinal polyps	Negative	-	-	35	99.18
314	F	Brown	36	Breast cancer	Breast, thyroid, colorectal, prostate	Negative	-	-	40	98.62
315	F	Brown	36	Breast cancer	Breast, leukemia, ovary, skin, thyroid	Negative	-	-	44	98.69
316	M	Brown	9	Intestinal polyps	Intestinal polyps, colorectal cancer	Negative	-	-	46	99.47
317	F	Brown	39	Breast cancer	Pancreas, breast	Negative	-	-	37	98.53
318	F	Brown	26	Colorectal cancer	Pancreas, prostate	Negative	-	-	45	98.72
319	F	Brown	57	Breast cancer	Breast, stomach, liver, ovary, prostate	Negative	-	-	36	98.55
320	F	Brown	47	Ovarian cancer	Breast, prostate, gallbladder, lymphoma	Negative	-	-	35	98.51
321	F	Brown	38	Breast, bladder and kidney cancer	Lung, stomach, kidney	Negative	-	-	38	98.62
322	F	Brown	40	Breast cancer	Breast, prostate, colorectal, liver, uterus, stomach	Negative	-	-	35	98.48
323	F	Black	46	Breast cancer	Esophagus, ovary, breast	Negative	-	-	23	97.99
324	F	Brown	53	Breast cancer	Breast	Negative	-	-	37	98.63
325	F	Brown	60	Breast cancer	Pancreas, breast, colorectal, eyes, skin	Negative	-	-	44	98.63
326	F	Brown	72	Bilateral breast cancer	Breast, kidney, thyroid, prostate	Negative	-	-	36	98.58
327	F	Brown	45	Breast cancer	No information	Negative	-	-	35	98.54
328	F	Black	37	Breast cancer	Prostate, ovary, lung	Negative	-	-	33	98.47
329	F	Brown	66	Breast cancer	Breast	Negative	-	-	27	98.29
330	F	Brown	34	Breast and kidney cancers	Thyroid, breast, skin, colorectal	Negative	-	-	33	98.53
331	F	White	45	Breast cancer	Prostate, ovary	Negative	-	-	37	98.56
332	F	Brown	44	Breast cancer	Breast, uterus, throat, CNS	Negative	-	-	49	98.73
333	F	Brown	59	Kidney cancer	No family history	Negative	-	-	30	98.48
334	F	Brown	25	Breast cancer	Lung, leukemia	Negative	-	-	33	98.56
335	F	Brown	46	Breast cancer	CNS, skin	Negative	-	-	53	98.79
336	F	Brown	24	Breast cancer	Breast, esophagus, prostate	Negative	-	-	28	98.33
337	F	Brown	12	Breast and kidney cancers	No family history	Negative	-	-	29	98.44
338	F	Brown	37	Breast cancer	Prostate, skin	Negative	-	-	21	97.38
339	F	Brown	46	Breast cancer	Breast	Negative	-	-	31	98.47
340	F	Brown	41	Breast cancer	Breast, lung	Negative	-	-	30	98.44
341	F	Yellow	35	Breast cancer	Breast, ovary, CNS	Negative	-	-	43	98.71
342	F	Brown	37	Stomach cancer	Colorectal, stomach, skin, leukemia	Negative	-	-	23	98.09
343	F	Black	30	Breast cancer	No family history	Negative	-	-	38	98.53
344	F	White	48	Breast cancer	Thyroid, uterus, kidney, prostate, breast, lung, testicle, colorectal	Negative	-	-	42	98.68
345	F	Brown	43	Breast cancer	Breast, prostate, skin, liver	Negative	-	-	29	98.41
346	F	Brown	43	Breast cancer	Breast, uterus	Negative	-	-	44	98.67
347	F	Brown	40	Breast cancer	Prostate	Negative	-	-	32	98.49
348	F	Brown	31	Breast cancer	Breast	Negative	-	-	39	98.62
349	M	Black	61	Intestinal polyps	Intestinal polyps and uterus cancer	Negative	-	-	56	99.47
350	F	Brown	38	Breast cancer	No family history	Negative	-	-	42	98.69
351	F	Brown	45	Breast cancer	Prostate, breast, uterus	Negative	-	-	36	98.59
352	F	Black	46	Breast cancer	Breast, stomach, prostate, thyroid, melanoma	Negative	-	-	49	98.69
353	F	White	39	uterus and kidney cancers	Breast, uterus, lung, throat, liver	Negative	-	-	42	98.64
354	M	Brown	64	Thyroid, prostate, lung, bladder	Thyroid, ovary	Negative	-	-	43	99.41
355	F	Brown	45	Breast cancer	Breast, stomach	Negative	-	-	37	98.6
356	F	Brown	51	Breast cancer	Breast, prostate, uterus, stomach	Negative	-	-	30	98.45
357	M	Brown	57	Colorectal cancer	Lung, leukemia	Negative	-	-	20	95.77
358	F	Brown	57	Breast and thyroid cancers	Breast, prostate, bone, colorectal	Negative	-	-	42	98.62
359	F	Brown	58	Breast cancer	Breast, skin, thyroid, prostate, stomach	Negative	-	-	35	98.56
360	F	Brown	36	Breast cancer	Breast	Negative	-	-	33	98.48
361	F	Brown	26	Breast cancer	Breast, colorectal	Negative	-	-	38	98.62
362	F	Brown	41	Breast cancer	Stomach, esophagus, colorectal	Negative	-	-	32	98.48
363	F	Brown	28	Breast cancer	Breast, lung, prostate, testicle	Negative	-	-	21	97.42
364	F	Brown	40	Breast cancer	Esophagus	Negative	-	-	43	98.63
365	F	Black	47	Breast cancer	CNS	Negative	-	-	37	98.57
366	F	Brown	41	Breast cancer	Breast, liver	Negative	-	-	36	98.63
367	F	Brown	42	Breast cancer	Lung	Negative	-	-	34	98.54
368	F	White	44	Breast cancer	Breast	Negative	-	-	44	98.67
369	F	Brown	45	Bilateral breast cancer and ovarian cancer	Skin, thyroid, ovary, leukemia	Negative	-	-	38	98.61
370	F	Brown	48	Breast cancer	No family history	Negative	-	-	50	98.71
371	F	Brown	27	Breast cancer	Breast, uterus	Negative	-	-	45	98.59
372	F	Brown	33	Breast cancer	Breast	Negative	-	-	41	98.67
373	F	Brown	35	Breast cancer	Thyroid, ovary, uterus	Negative	-	-	34	98.54
374	F	Brown	33	Colorectal cancer	Lymphoma, prostate, skin, breast, throat, liver, lung, skin, breast, throat	Negative	-	-	40	98.65
375	F	Brown	50	Breast cancer	Breast, lung	Negative	-	-	32	98.47
376	F	Brown	42	Ovarian cancer	No information	Negative	-	-	35	98.58
377	F	Brown	44	Breast cancer	Lung, prostate, uterus	Negative	-	-	38	98.62
378	F	Brown	37	Breast cancer	No family history	Negative	-	-	19	95.67
379	F	White	47	Breast cancer	Prostate, bladder, sarcoma, colorectal	Negative	-	-	38	98.63
380	F	Brown	32	Breast cancer	Stomach, leukemia, breast, uterus, liver	Negative	-	-	40	98.62
381	F	Brown	46	Breast cancer	Leukemia, uterus, colorectal, CNS	Negative	-	-	43	98.63
382	F	Black	44	Breast and colorectal cancers	Prostate	Negative	-	-	33	98
383	F	Black	35	Breast cancer	No family history	Negative	-	-	70	98.81
384	F	Brown	39	Thyroid cancer	Colorectal, stomach	Negative	-	-	34	98.52
385	F	Brown	25	Ovarian cancer	Uterus	Negative	-	-	29	98.38
386	F	Brown	29	Breast cancer	Breast, ovary, leukemia	Negative	-	-	56	99.49
387	F	Brown	52	Breast cancer	Breast, colorectal, stomach	Negative	-	-	31	98.41
388	F	Brown	53	Breast cancer	Stomach, esophagus	Negative	-	-	23	98.03
389	F	Brown	40	Breast cancer	Stomach, mouth, uterus, throat, breast	Negative	-	-	25	98.25
390	F	White	35	Bilateral breast cancer	Breast, skin, prostate, uterus, lung, leukemia, larynx	Negative	-	-	40	98.65
391	F	Black	43	Breast cancer	Prostate, ovary, uterus	Negative	-	-	40	98.55
392	F	Brown	68	Breast, uterus and stomach cancers	Colorectal, breast, sarcoma, skin	Negative	-	-	43	98.66
393	F	Black	60	Breast cancer	Breast, ovary, colorectal	Negative	-	-	40	98.58
394	F	Black	41	Bilateral breast cancer	Uterus	Negative	-	-	31	98.37
395	F	Brown	34	Breast cancer	Prostate, breast	Negative	-	-	44	98.66
396	F	Brown	53	Breast cancer	Pancreas	Negative	-	-	32	98.46
397	F	Black	36	Breast cancer	Prostate, stomach, uterus	Negative	-	-	27	98.29
398	F	Black	32	Breast cancer	Colorectal	Negative	-	-	27	98.39
399	F	White	32	Breast cancer	Colorectal, breast, CNS, prostate	Negative	-	-	39	98.63
400	F	Brown	54	Breast cancer and lymphoma	Stomach, prostate, thyroid	Negative	-	-	37	98.61
